# Supplementary material
Source: publisher figshare collection journal article supplement (https://karger.figshare.com/ndownloader/files/10725208)
Supplement: Supplementary file 1 [file 10725208]

Supplementary Table 1. Predictors of swelling volume

|  | **Entire Cohort** | | | | | | | | |
| --- | --- | --- | --- | --- | --- | --- | --- | --- | --- |
|  | Univariate | | | |  | Multivariable | | | |
|  | Beta | 95% CI | r2 | p |  | Beta | 95% CI | Adj. r2 | p |
| Age | 0.009 | –0.013 to 0.031 | 0.01 | 0.42 |  | –– | –– | –– | –– |
| Baseline NIHSS | 0.098 | 0.036 to 0.16 | 0.14 | 0.0023 |  | 0.062 | –0.0029 to 0.13 | 0.20 | 0.061 |
| DWI lesion volume (log) | 0.59 | 0.27 to 0.92 | 0.17 | 0.0005 |  | 0.45 | 0.10 to 0.80 | 0.20 | 0.013 |
| Baseline Glucose (log) | 0.53 | –0.22 to 1.3 | 0.031 | 0.16 |  | –– | –– | –– | –– |
|  |  |  |  |  |  |  |  |  |  |
|  | **ADCr < 64%** | | | | | | | | |
|  | Univariate | | | |  | Multivariable | | | |
|  | Beta | 95% CI | r2 | p |  | Beta | 95% CI | Adj. r2 | p |
| DWI lesion volume (log) | 0.95 | 0.28 to 1.61 | 0.33 | 0.0078 |  | 0.75 | 0.14 to 1.37 | 0.47 | 0.020 |
| AOL 0-1 vs 2-3 | 1.17 | 0.32 to 2.02 | 0.33 | 0.0099 |  | 0.93 | 0.17 to 1.70 | 0.47 | 0.020 |
|  |  |  |  |  |  |  |  |  |  |
|  | **ADCr ≥ 64%** | | | | | | | | |
|  | Univariate | | | |  | Multivariable | | | |
|  | Beta | 95% CI | r2 | p |  | Beta | 95% CI | Adj. r2 | p |
| DWI lesion volume (log) | 0.34 | –0.069 to 0.75 | 0.061 | 0.10 |  | –– | –– | –– | –– |
| AOL 0-1 vs 2-3 | 0.10 | –0.39 to 0.59 | 0.0042 | 0.67 |  | –– | –– | –– | –– |

* Swelling volume was transformed using a cube root to account for non-normal distribution of volumes with a number of zero values.
